# Supplementary material for: Histone Sample Preparation for Bottom-Up Mass Spectrometry: A Roadmap to Informed Decisions
Source: MDPI journal article supplement (doi:10.3390/proteomes9020017), 2021-04-21
Supplement: s1 [file s1]

Supplementary data

**Supplementary Figure S1.** Coverage plots of all core histones from the AQUA heavy histone peptide standard from Li et al [29].

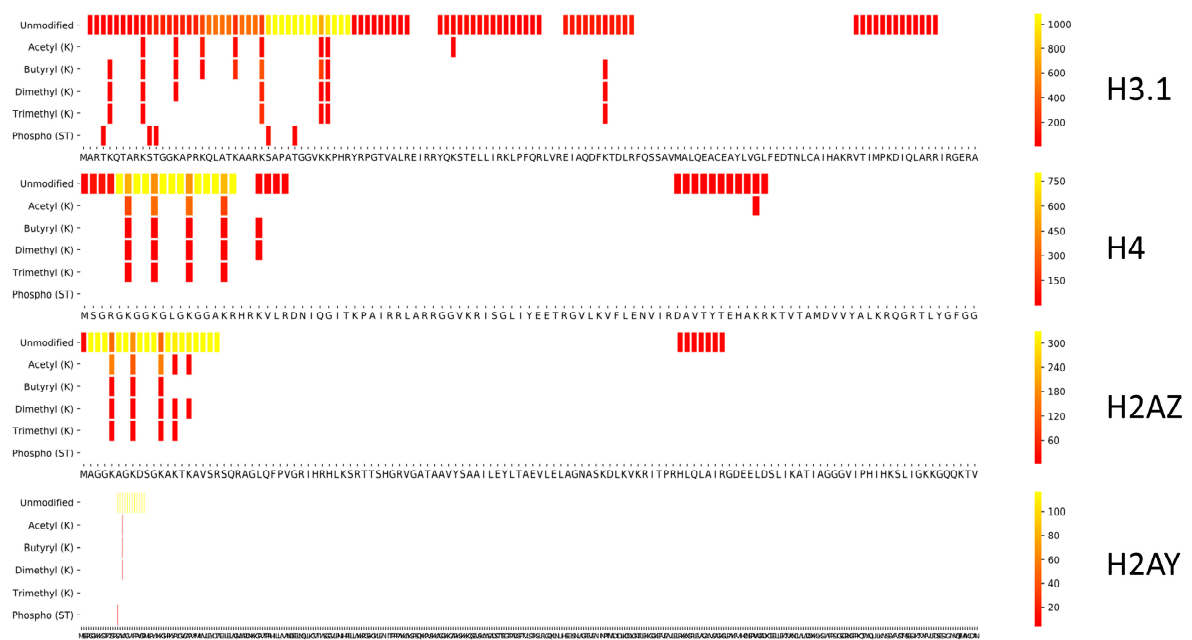

**Supplementary Figure S2.** Mascot example of peptide H2B 1-29 with multiple possible annotations above scoring threshold for the same mass spectrum. The first hit is reported in the spectrum with a score of 63.4 and expectancy value of 4.6 e-6.

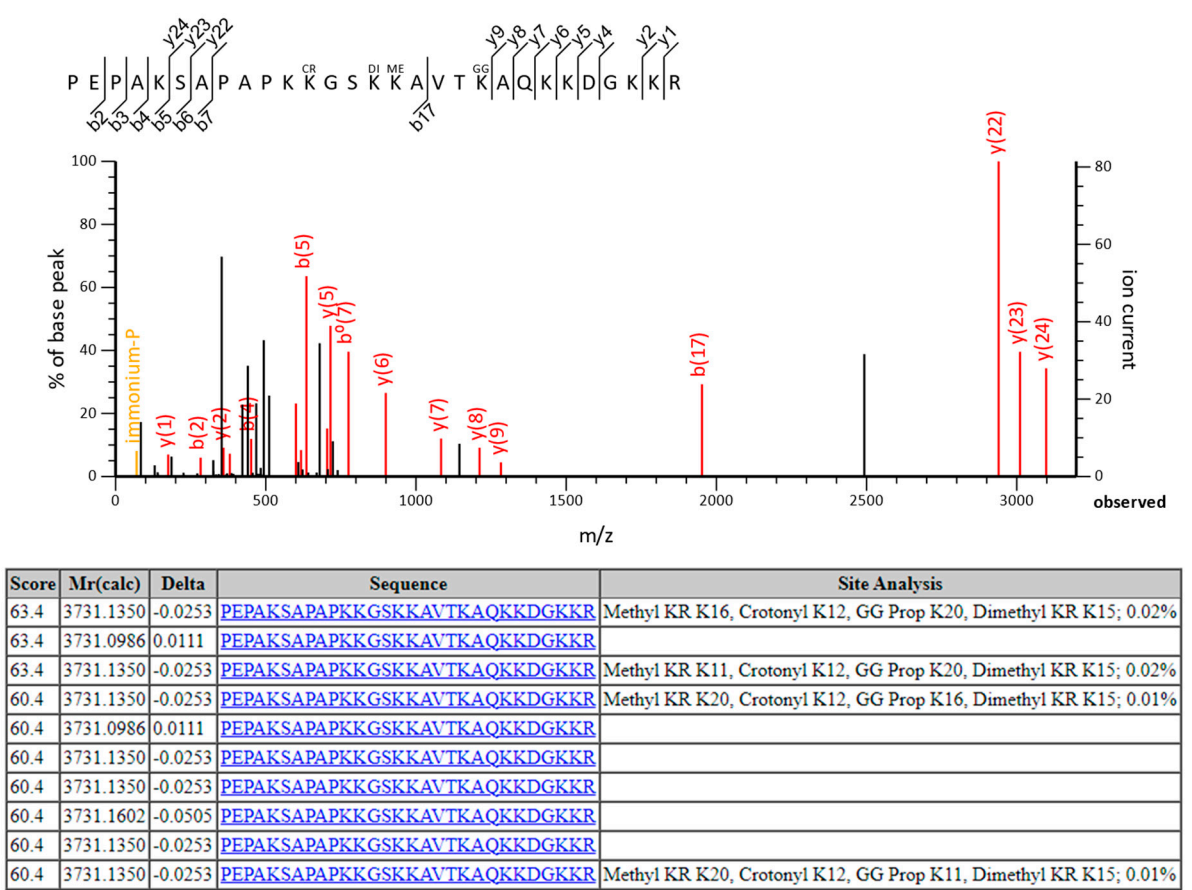

**Supplementary Figure S3.** Coverage plot of Histone H3.2 for each workflow highlighting the chemical noise and obscured regions introduced by PropTryp.

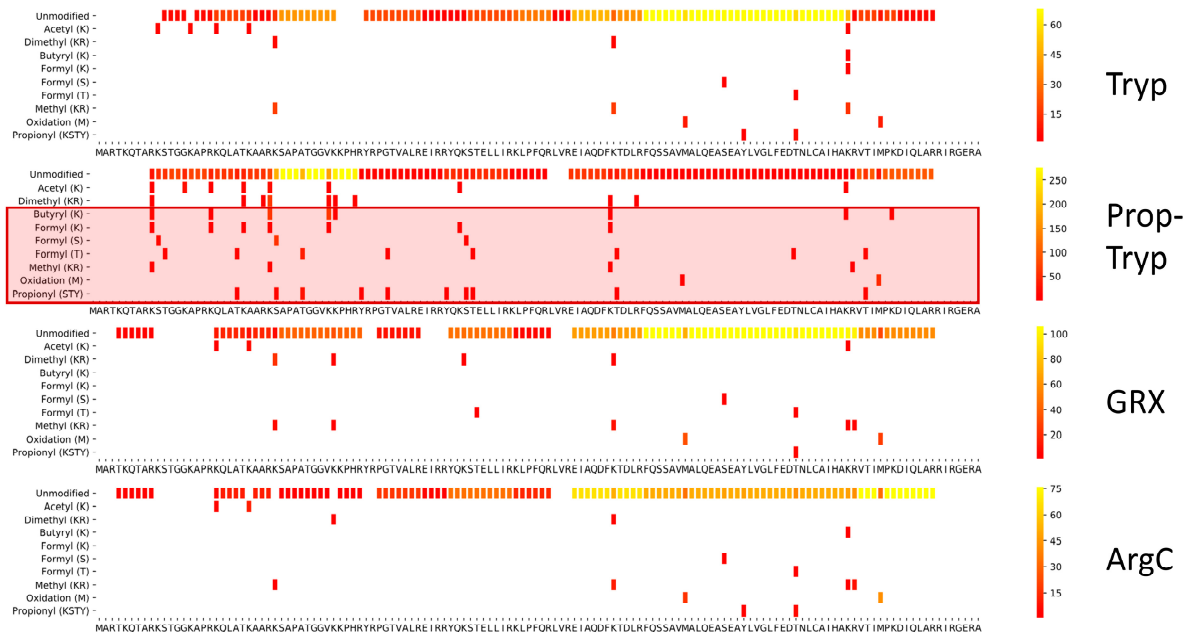

**Supplementary Figure S4.** Coverage plot of Histone H4 for each workflow highlighting the chemical noise and obscured regions introduced by PropTryp.

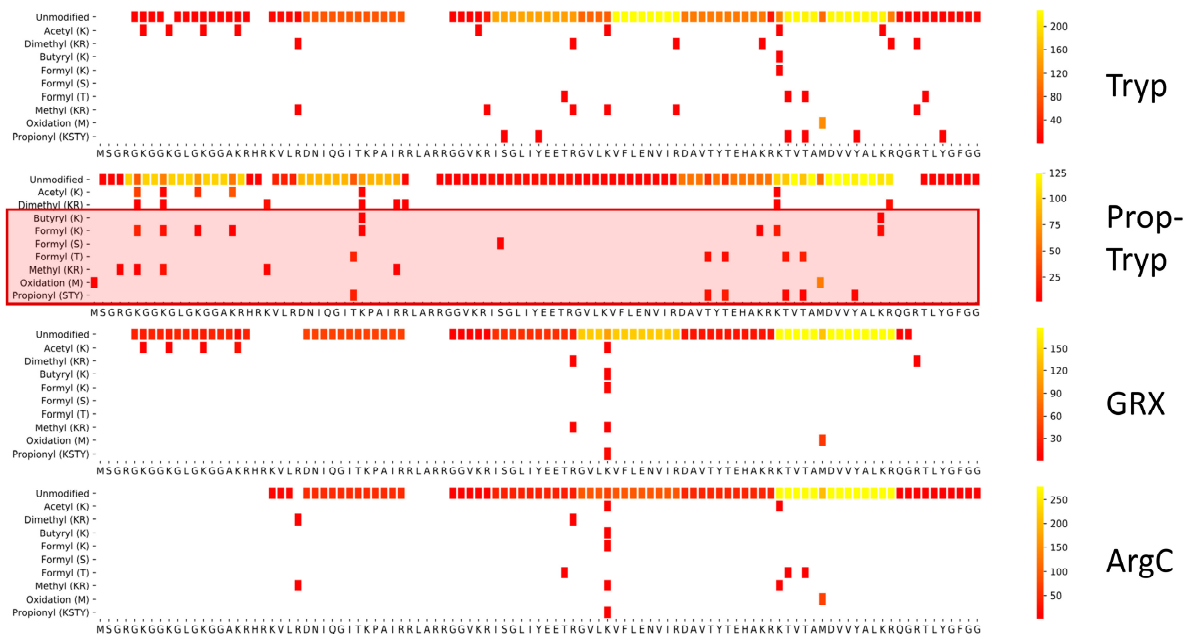

**Supplementary Figure S5.** Coverage plot of Histone H2A1 for each workflow highlighting the chemical noise and obscured regions introduced by PropTryp.

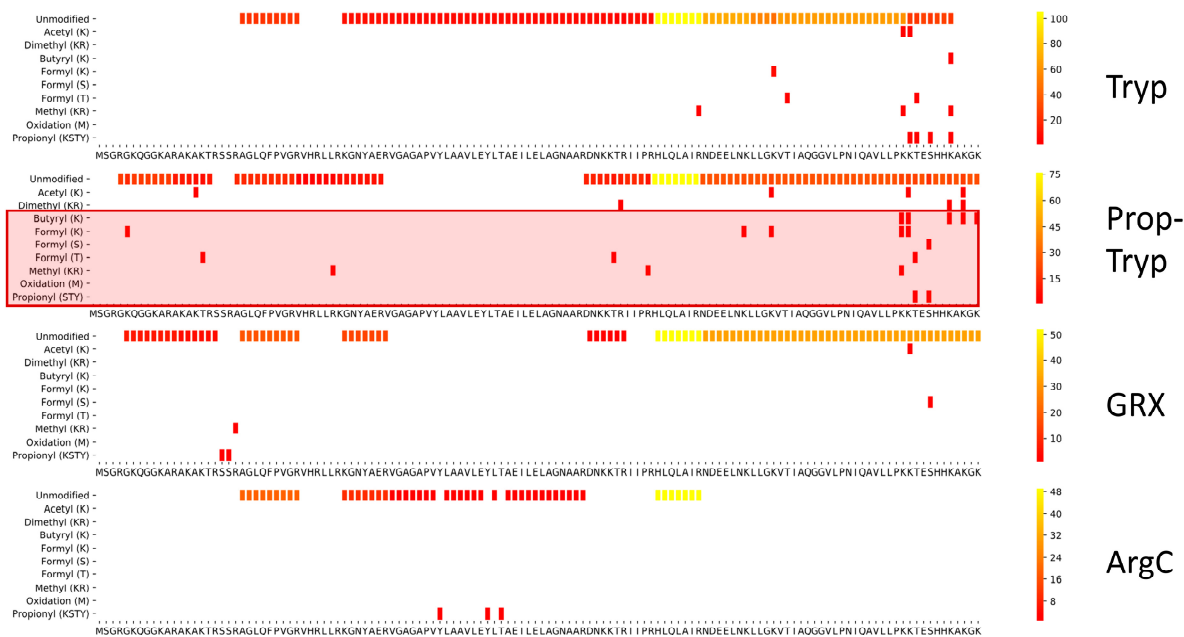

**Supplementary Figure S6.** Coverage plot of Histone H2B1 for each workflow highlighting the chemical noise and obscured regions introduced by PropTryp.

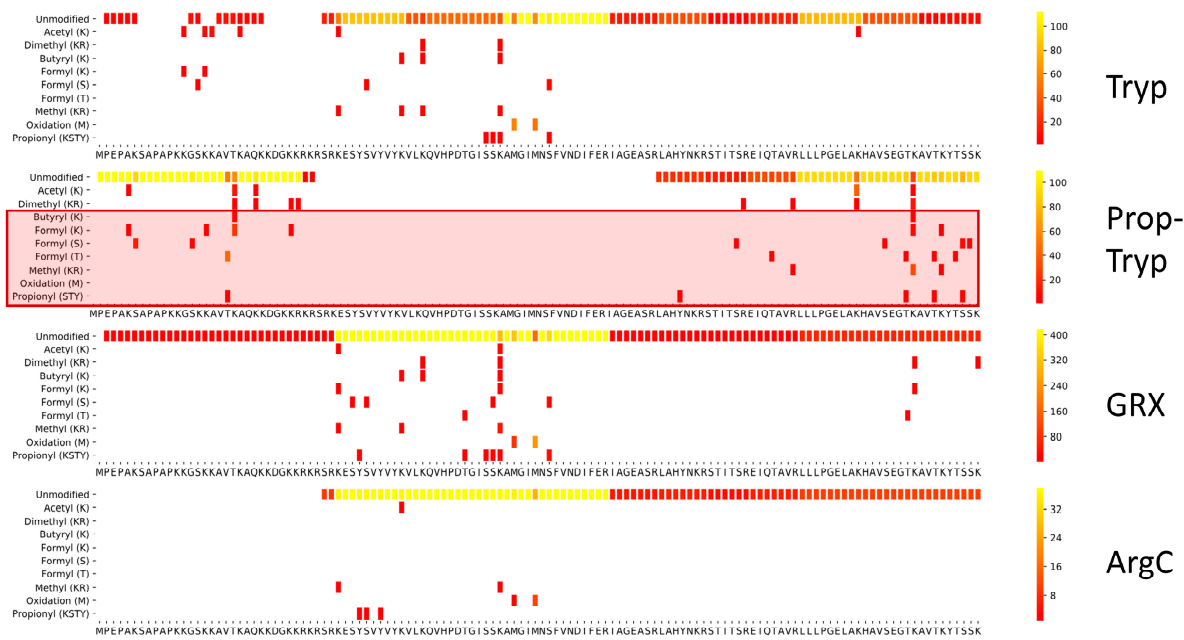

**Supplementary Figure S7.** Coverage plot of Histone H4 for each workflow with the predicted coverage derived from Uniprot as a reference.

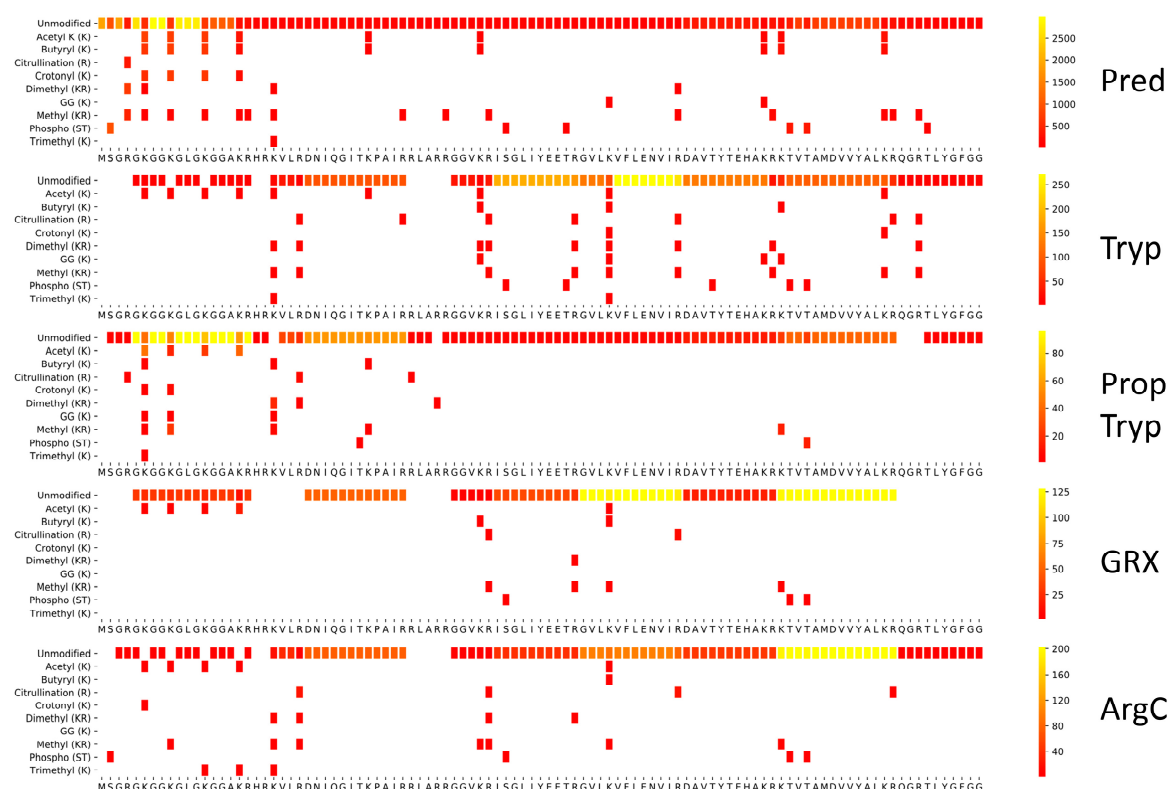

**Supplementary Figure S8.** Coverage plot of Histone H2A1 for each workflow with the predicted coverage derived from Uniprot as a reference.

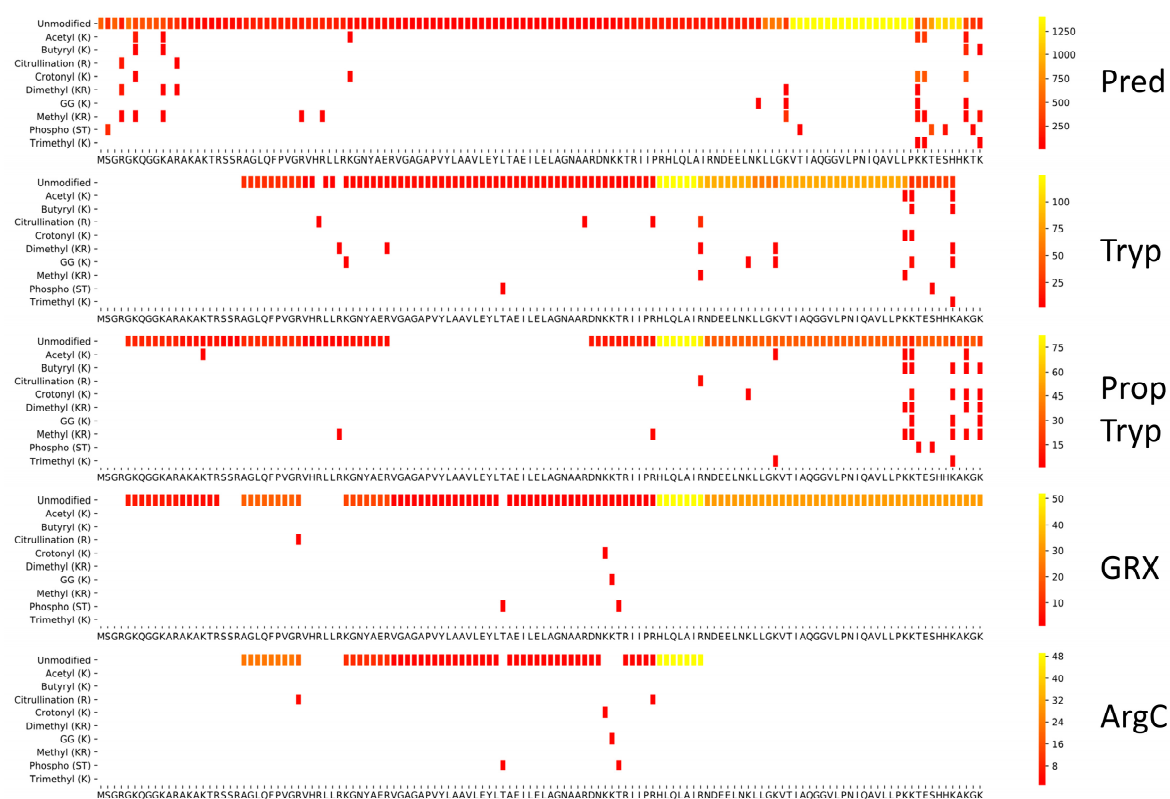



**Supplementary Figure S9.** Coverage plot of Histone H2B1 for each workflow with the predicted coverage derived from Uniprot as a reference.

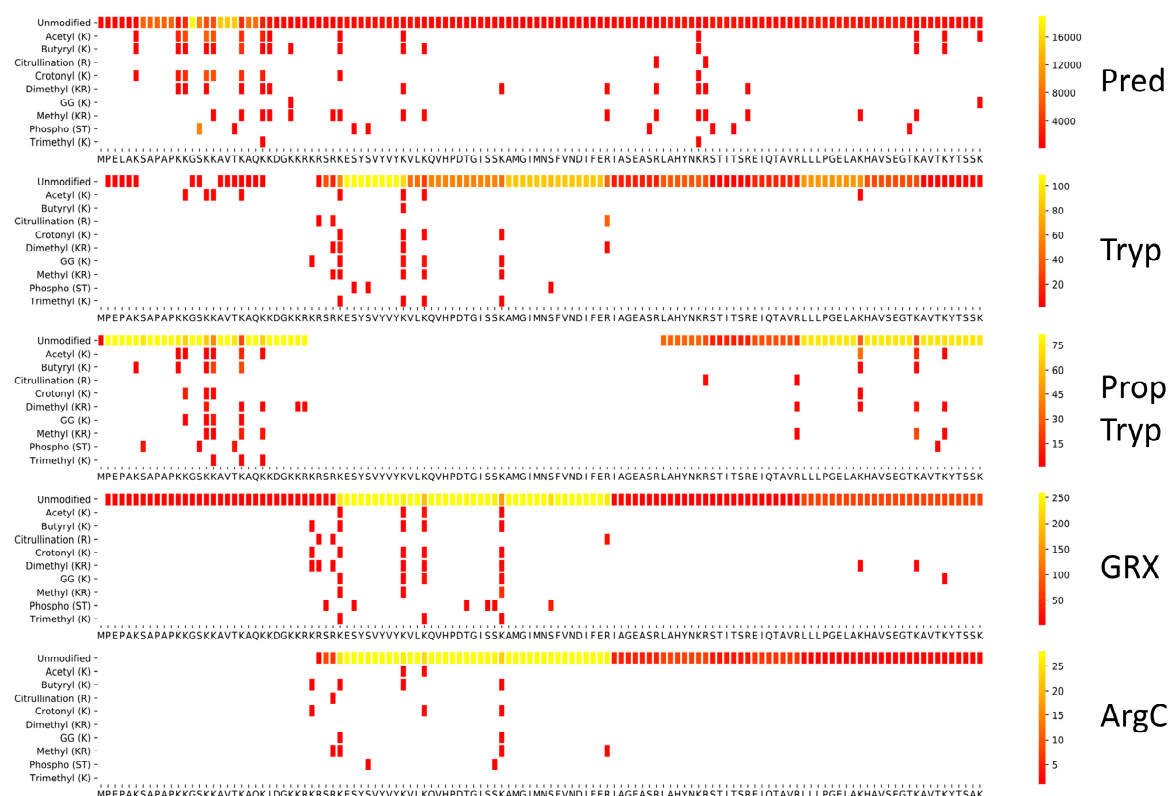

**Supplementary Figure S10.** Coverage plot of Histone H1.2 for each workflow with the predicted coverage derived from Uniprot as a reference. The ArgC workflow did not cover Histone H1.

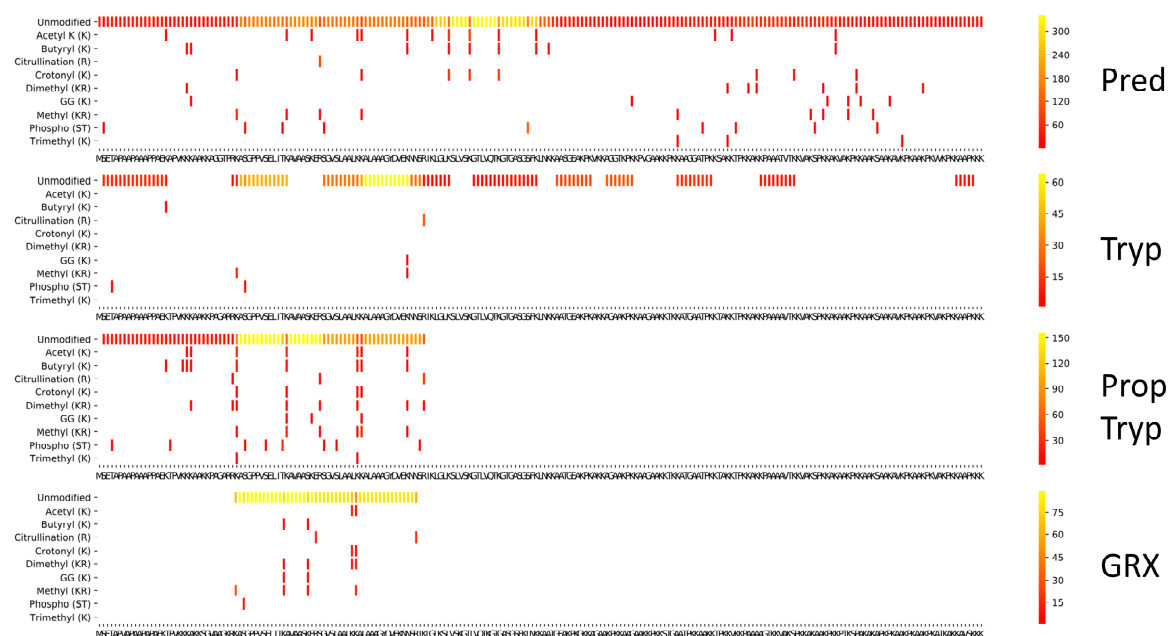

**Supplementary Figure S11.** Coverage plots of all histone H1 variants detected with the Tryp, PropTryp and GRX workflows.

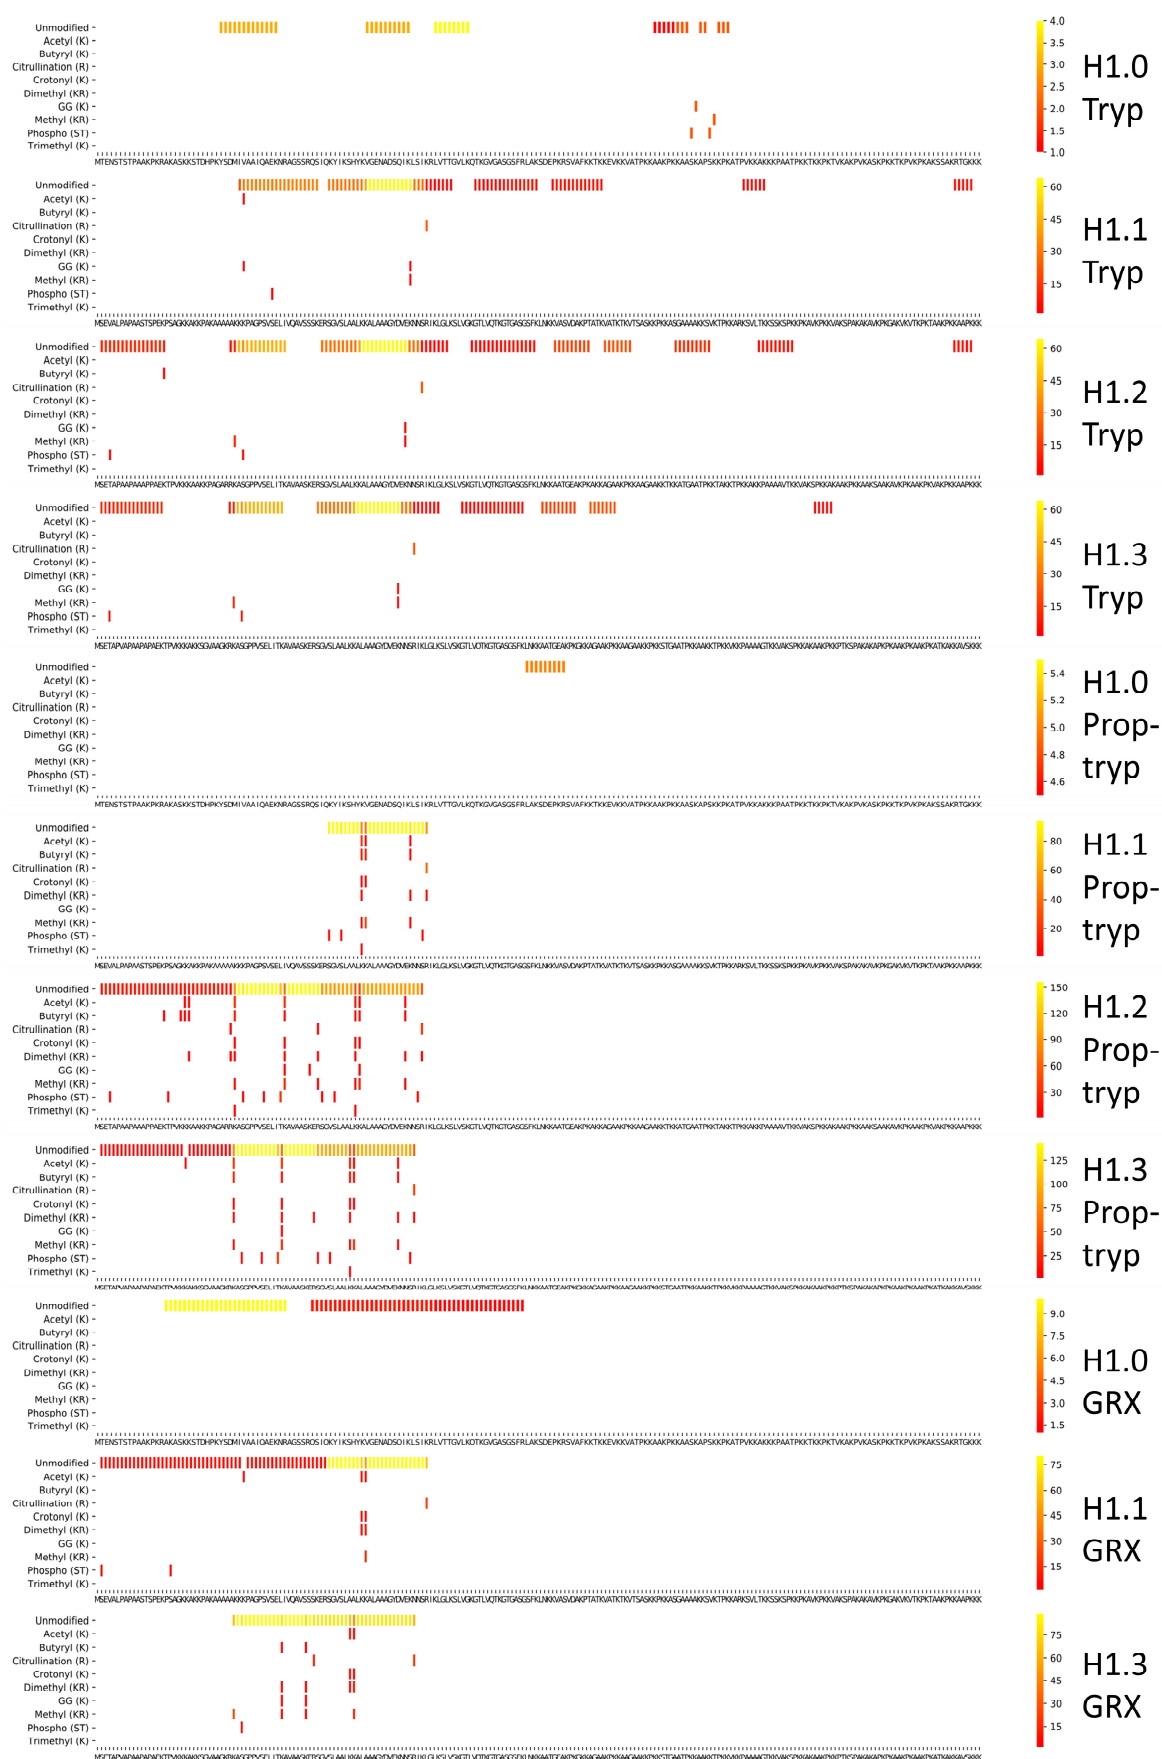

**Supplementary Figure S12: feature detectability for different enzymatic treatments. (A-C)** Two dimensional consensus representations of the different treatments with retention time in the y-axis from top to bottom and the m/z on the X-Axis. Note that the retention time is represented by scan rate and is not linear. Note that the spread of features across the LC gradient is better for PropTryp. **(D)** Charge state distribution of all annotated ions.

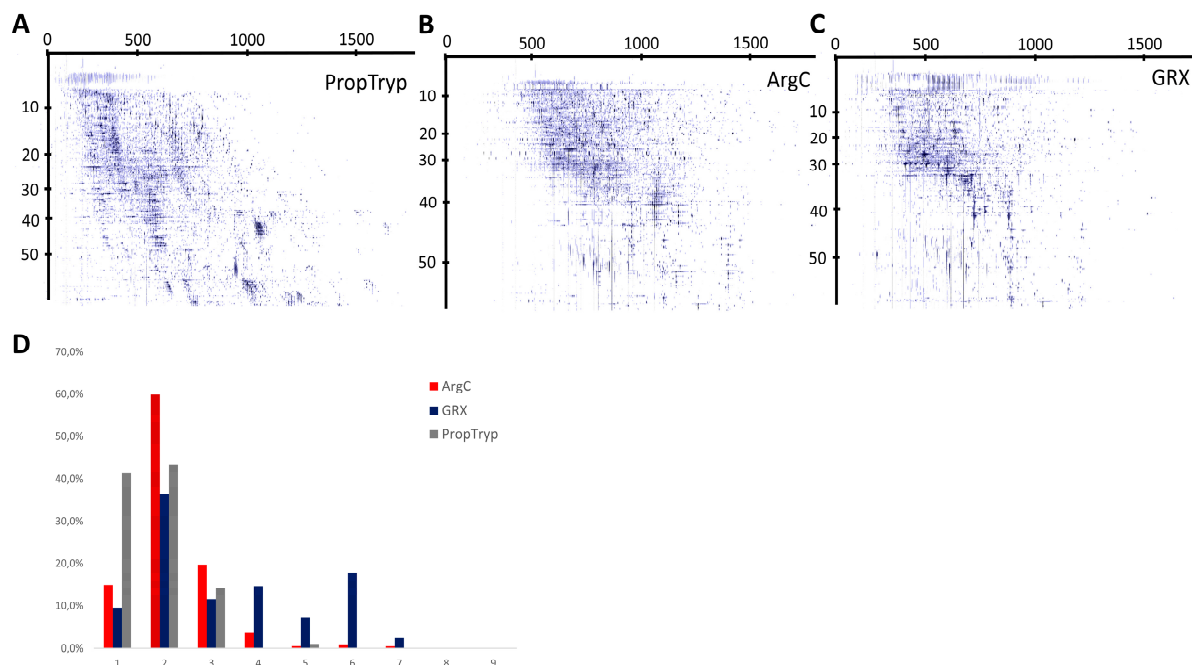

**Supplementary Figure S13.** Coverage plot of the Semi-specific arginine cleavage search on the ArgC workflow data shows a great coverage of all histone proteins and their modifications. Still, enzymatic aspecificity complicates downstream quantification as shown in Figure 7. The variants displayed are H3.2, H2A1, and H2B1.

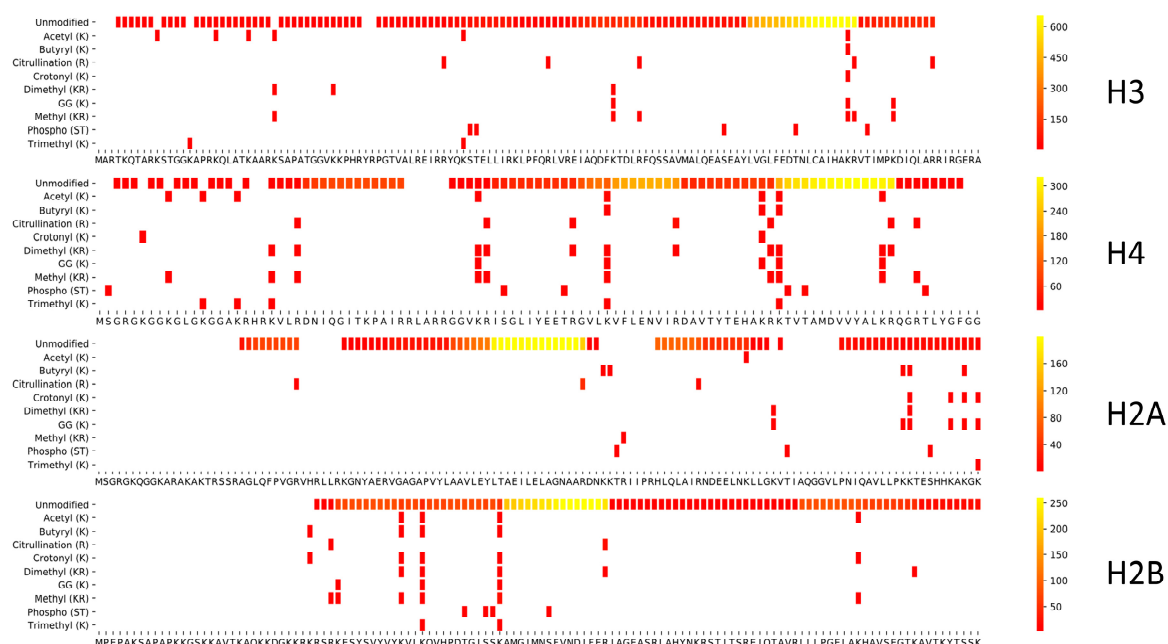

**Supplementary Figure S14.** Localization of the most prominent peptidoforms of the PropTryp workflow in the 3D ion space of the Progenesis QIP software.

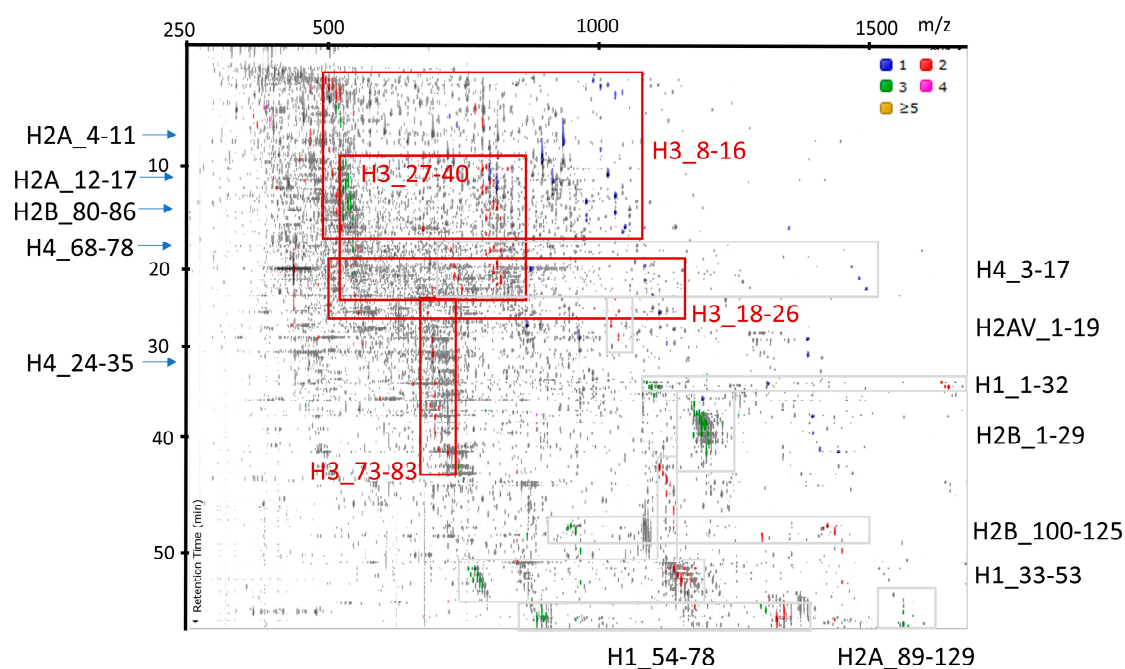

**Supplementary Figure S15.** Localization of the most prominent peptidoforms of the GRX workflow in the 3D ion space of the Progenesis QIP software.

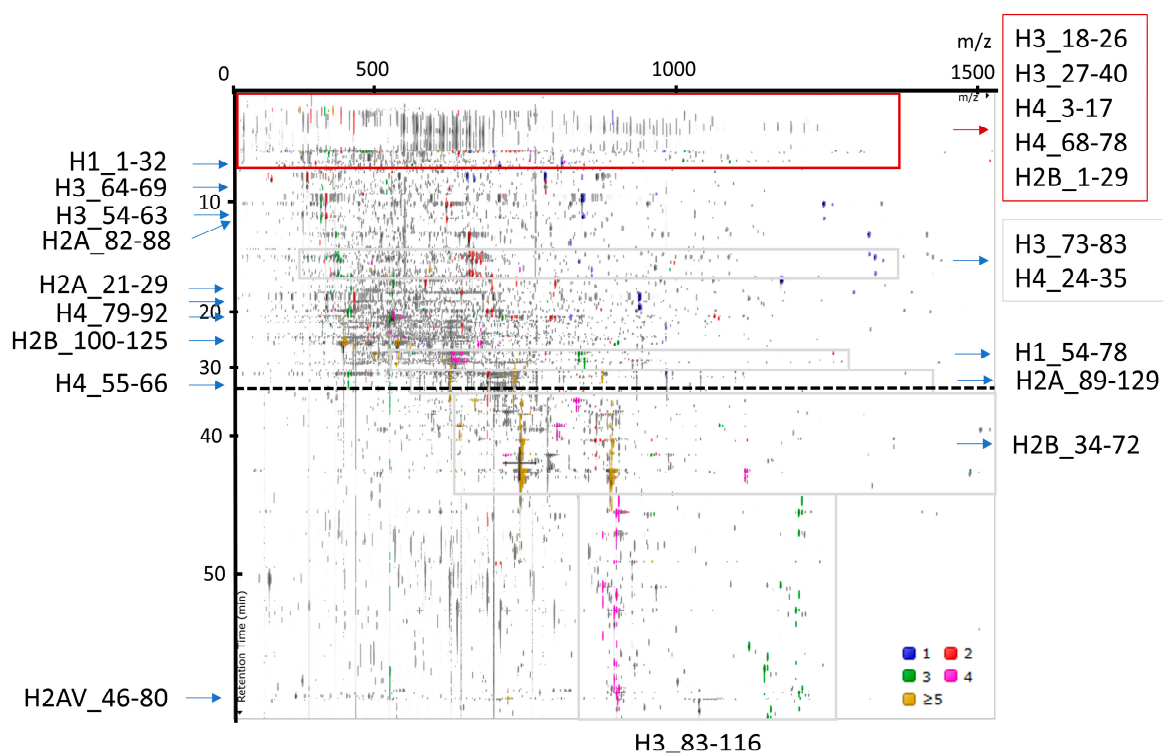

**Supplementary table 1.** All features exported from Progenesis QIP for all workflows. Detailed legend can be found in the excel file

**Supplementary table 2.** All annotated features exported from Progenesis QIP for the ArgC, GRX, and PropTryp workflow. Detailed legend can be found in the excel file.
